# Supplementary material for: Comparative Assessment of Five Machine Learning Algorithms for Supervised Object-Based Classification of Submerged Seagrass Beds Using High-Resolution UAS Imagery
Source: MDPI journal article supplement (doi:10.3390/rs15143600), 2023-07-19

# Supplementary Material

Table S1 & S2: User and producer accuracies of all performed classifications

Table S1

|            |                          | Favourable conditions  |           |       |           |                       |       |       |           |                        |       |       |           |                       |       |       |           |
|------------|--------------------------|------------------------|-----------|-------|-----------|-----------------------|-------|-------|-----------|------------------------|-------|-------|-----------|-----------------------|-------|-------|-----------|
|            |                          | 100m altitude          |           |       |           |                       |       |       |           | 30m altitude           |       |       |           |                       |       |       |           |
|            |                          | 250 samples Scenario 1 |           |       |           | 50 samples Scenario 2 |       |       |           | 250 samples Scenario 3 |       |       |           | 50 samples Scenario 4 |       |       |           |
| Classifier | Hyper-parameter          | Eelgrass               |           | Sand  |           | Eelgrass              |       | Sand  |           | Eelgrass               |       | Sand  |           | Eelgrass              |       | Sand  |           |
| Bayes      |                          | PA                     | UA        | PA    | UA        | PA                    | UA    | PA    | UA        | PA                     | UA    | PA    | UA        | PA                    | UA    | PA    | UA        |
|            |                          | 0.915                  | 0.996     | 0.993 | 0.855     | 0.972                 | 0.938 | 0.873 | 0.939     | 0.915                  | 0.985 | 0.981 | 0.895     | 0.957                 | 0.941 | 0.918 | 0.941     |
| DT         | DT Depth 1               | 0.968                  | 0.834     | 0.620 | 0.907     | 0.979                 | 0.818 | 0.570 | 0.931     | 0.954                  | 0.865 | 0.798 | 0.927     | 0.940                 | 0.877 | 0.822 | 0.910     |
|            | DT Depth 5               | 0.865                  | 0.897     | 0.803 | 0.750     | 0.929                 | 0.847 | 0.669 | 0.826     | 0.904                  | 0.969 | 0.962 | 0.881     | 0.840                 | 0.967 | 0.962 | 0.816     |
|            | DT Depth 10              | 0.865                  | 0.897     | 0.803 | 0.750     | 0.929                 | 0.847 | 0.669 | 0.826     | 0.904                  | 0.969 | 0.962 | 0.881     | 0.840                 | 0.967 | 0.962 | 0.816     |
|            | DT Depth 15              | 0.865                  | 0.897     | 0.803 | 0.750     | 0.929                 | 0.847 | 0.669 | 0.826     | 0.904                  | 0.969 | 0.962 | 0.881     | 0.840                 | 0.967 | 0.962 | 0.816     |
|            | DT Depth 20              | 0.865                  | 0.897     | 0.803 | 0.750     | 0.929                 | 0.847 | 0.669 | 0.826     | 0.904                  | 0.969 | 0.962 | 0.881     | 0.840                 | 0.967 | 0.962 | 0.816     |
| KNN        | KNN K1                   | 0.940                  | 0.971     | 0.944 | 0.887     | 0.861                 | 0.900 | 0.810 | 0.747     | 0.954                  | 0.950 | 0.933 | 0.937     | 0.893                 | 0.900 | 0.865 | 0.857     |
|            | KNN K5                   | 0.940                  | 0.971     | 0.944 | 0.887     | 0.861                 | 0.900 | 0.810 | 0.747     | 0.950                  | 0.967 | 0.957 | 0.934     | 0.936                 | 0.877 | 0.822 | 0.905     |
|            | KNN K10                  | 0.940                  | 0.971     | 0.944 | 0.887     | 0.521                 | 0.881 | 0.964 | 0.799     | 0.918                  | 0.952 | 0.938 | 0.894     | 0.947                 | 0.866 | 0.803 | 0.918     |
|            | KNN K15                  | 0.940                  | 0.971     | 0.944 | 0.887     | 0.929                 | 0.847 | 0.669 | 0.826     | 0.904                  | 0.969 | 0.962 | 0.881     | 0.954                 | 0.862 | 0.793 | 0.927     |
|            | KNN K20                  | 0.954                  | 0.944     | 0.887 | 0.906     | 0.893                 | 0.837 | 0.655 | 0.756     | 0.929                  | 0.922 | 0.894 | 0.903     | 0.940                 | 0.863 | 0.798 | 0.907     |
| RT         | RT Depth 1               | 0.968                  | 0.834     | 0.620 | 0.907     | 0.947                 | 0.834 | 0.627 | 0.856     | 0.922                  | 0.896 | 0.856 | 0.890     | 0.922                 | 0.912 | 0.880 | 0.893     |
|            | RT Depth 5               | 0.904                  | 0.924     | 0.852 | 0.818     | 0.929                 | 0.876 | 0.739 | 0.840     | 0.925                  | 0.959 | 0.947 | 0.904     | 0.918                 | 0.935 | 0.913 | 0.892     |
|            | RT Depth 10              | 0.883                  | 0.929     | 0.866 | 0.788     | 0.929                 | 0.842 | 0.655 | 0.823     | 0.929                  | 0.967 | 0.957 | 0.909     | 0.922                 | 0.899 | 0.861 | 0.891     |
|            | RT Depth 15              | 0.883                  | 0.936     | 0.880 | 0.791     | 0.936                 | 0.851 | 0.676 | 0.842     | 0.943                  | 0.953 | 0.938 | 0.924     | 0.922                 | 0.887 | 0.841 | 0.888     |
|            | RT Depth 20              | 0.875                  | 0.928     | 0.866 | 0.778     | 0.922                 | 0.869 | 0.725 | 0.824     | 0.929                  | 0.967 | 0.957 | 0.909     | 0.900                 | 0.907 | 0.875 | 0.867     |
| SVM        | SVM linear_C2            | 0.794                  | 0.676     | 0.246 | 0.376     | 0.698                 | 0.669 | 0.317 | 0.346     | 0.957                  | 0.968 | 0.957 | 0.943     | 0.922                 | 0.963 | 0.952 | 0.900     |
|            | SVM linear_C4            | 0.922                  | 0.912     | 0.824 | 0.842     | 0.936                 | 0.936 | 0.873 | 0.873     | 0.957                  | 0.968 | 0.957 | 0.943     | 0.911                 | 0.959 | 0.947 | 0.887     |
|            | SVM linear_C6            | 0.968                  | 0.961     | 0.923 | 0.936     | 0.708                 | 0.737 | 0.500 | 0.464     | 0.968                  | 0.958 | 0.942 | 0.956     | 0.918                 | 0.959 | 0.947 | 0.895     |
|            | SVM linear_C8            | 0.815                  | 0.741     | 0.437 | 0.544     | 0.826                 | 0.928 | 0.873 | 0.717     | 0.964                  | 0.982 | 0.976 | 0.953     | 0.918                 | 0.956 | 0.942 | 0.895     |
|            | SVM linear_C10           | 0.776                  | 0.688     | 0.303 | 0.406     | 0.826                 | 0.928 | 0.873 | 0.717     | 0.972                  | 0.945 | 0.923 | 0.960     | 0.918                 | 0.956 | 0.942 | 0.895     |
|            | SVM rbf_g0.0001_C1       | 0.989                  | 0.808     | 0.535 | 0.962     | 0.979                 | 0.836 | 0.620 | 0.936     | 0.957                  | 0.903 | 0.861 | 0.937     | 0.964                 | 0.831 | 0.736 | 0.939     |
|            | SVM rbf_g0.0001_C1000    | 0.972                  | 0.978     | 0.958 | 0.944     | 0.900                 | 0.941 | 0.887 | 0.818     | 0.947                  | 0.971 | 0.962 | 0.930     | 0.925                 | 0.939 | 0.918 | 0.901     |
|            | SVM rbf_g0.0001_C1000000 | 0.797                  | 0.926     | 0.873 | 0.685     | 0.897                 | 0.940 | 0.887 | 0.813     | 0.957                  | 0.961 | 0.947 | 0.943     | 0.861                 | 0.938 | 0.923 | 0.831     |
|            | SVM rbf_g1_C1            | 1.000                  | 0.664     | 0.000 | undefined | 0.996                 | 0.665 | 0.007 | 0.500     | 1.000                  | 0.576 | 0.005 | 1.000     | 1.000                 | 0.575 | 0.000 | undefined |
|            | SVM rbf_g1_C1000         | 0.996                  | 0.683     | 0.085 | 0.923     | 0.996                 | 0.665 | 0.007 | 0.500     | 1.000                  | 0.608 | 0.130 | 1.000     | 1.000                 | 0.607 | 0.125 | 1.000     |
|            | SVM rbf_g1_C1000000      | 0.996                  | 0.683     | 0.085 | 0.923     | 0.996                 | 0.665 | 0.007 | 0.500     | 1.000                  | 0.608 | 0.130 | 1.000     | 1.000                 | 0.607 | 0.125 | 1.000     |
|            | SVM rbf_g1000_C1         | 0.000                  | undefined | 1.000 | 0.664     | 1.000                 | 0.664 | 0.000 | undefined | 1.000                  | 0.575 | 0.000 | undefined | 1.000                 | 0.575 | 0.000 | undefined |
|            | SVM rbf_g1000_C1000      | 1.000                  | 0.667     | 0.014 | 1.000     | 1.000                 | 0.664 | 0.000 | undefined | 1.000                  | 0.576 | 0.005 | 1.000     | 1.000                 | 0.575 | 0.000 | undefined |
|            | SVM rbf_g1_C1000000      | 0.996                  | 0.683     | 0.085 | 0.923     | 1.000                 | 0.664 | 0.000 | undefined | 1.000                  | 0.576 | 0.005 | 1.000     | 1.000                 | 0.575 | 0.000 | undefined |

Table S2

|            |                          | Unfavourable conditions |           |       |       |                       |           |       |       |                        |       |       |       |                       |       |       |           |       |
|------------|--------------------------|-------------------------|-----------|-------|-------|-----------------------|-----------|-------|-------|------------------------|-------|-------|-------|-----------------------|-------|-------|-----------|-------|
|            |                          | 100m altitude           |           |       |       |                       |           |       |       | 30m altitude           |       |       |       |                       |       |       |           |       |
|            |                          | 250 samples Scenario 5  |           |       |       | 50 samples Scenario 6 |           |       |       | 250 samples Scenario 7 |       |       |       | 50 samples Scenario 8 |       |       |           |       |
|            |                          | Eelgrass                |           | Sand  |       | Eelgrass              |           | Sand  |       | Eelgrass               |       | Sand  |       | Eelgrass              |       | Sand  |           |       |
| Classifier | Hyper-parameter          | PA                      | UA        | PA    | UA    | PA                    | UA        | PA    | UA    | PA                     | UA    | PA    | UA    | PA                    | UA    | PA    | UA        |       |
| Bayes      |                          | 0.889                   | 0.847     | 0.738 | 0.804 | 0.654                 | 0.701     | 0.547 | 0.492 | 0.895                  | 0.902 | 0.898 | 0.891 | 0.895                 | 0.719 | 0.633 | 0.852     |       |
|            | DT Depth 1               | 0.921                   | 0.715     | 0.401 | 0.758 | 0.886                 | 0.736     | 0.483 | 0.722 | 0.957                  | 0.911 | 0.902 | 0.953 | 0.914                 | 0.933 | 0.931 | 0.912     |       |
|            | DT Depth 5               | 0.696                   | 0.841     | 0.785 | 0.614 | 0.879                 | 0.707     | 0.407 | 0.673 | 0.922                  | 0.908 | 0.902 | 0.917 | 0.942                 | 0.801 | 0.755 | 0.925     |       |
|            | DT Depth 10              | 0.738                   | 0.672     | 0.779 | 0.829 | 0.879                 | 0.707     | 0.407 | 0.673 | 0.922                  | 0.908 | 0.902 | 0.917 | 0.942                 | 0.801 | 0.755 | 0.925     |       |
|            | DT Depth 15              | 0.779                   | 0.829     | 0.738 | 0.672 | 0.750                 | 0.691     | 0.453 | 0.527 | 0.922                  | 0.908 | 0.902 | 0.917 | 0.942                 | 0.801 | 0.755 | 0.925     |       |
| DT         | DT Depth 20              | 0.779                   | 0.829     | 0.738 | 0.672 | 0.750                 | 0.691     | 0.453 | 0.527 | 0.922                  | 0.908 | 0.902 | 0.917 | 0.942                 | 0.801 | 0.755 | 0.925     |       |
|            | KNN K1                   | 0.868                   | 0.824     | 0.698 | 0.764 | 0.686                 | 0.688     | 0.494 | 0.491 | 0.883                  | 0.901 | 0.898 | 0.880 | 0.907                 | 0.900 | 0.894 | 0.901     |       |
|            | KNN K5                   | 0.657                   | 0.739     | 0.857 | 0.803 | 0.821                 | 0.747     | 0.547 | 0.653 | 0.883                  | 0.901 | 0.898 | 0.880 | 0.907                 | 0.900 | 0.894 | 0.901     |       |
|            | KNN K10                  | 0.875                   | 0.759     | 0.547 | 0.729 | 0.401                 | 0.742     | 0.914 | 0.713 | 0.883                  | 0.901 | 0.898 | 0.880 | 0.907                 | 0.900 | 0.894 | 0.901     |       |
|            | KNN K15                  | 0.854                   | 0.771     | 0.587 | 0.711 | 0.975                 | 0.666     | 0.203 | 0.833 | 0.883                  | 0.901 | 0.898 | 0.880 | 0.907                 | 0.900 | 0.894 | 0.901     |       |
| KNN        | KNN K20                  | 0.893                   | 0.740     | 0.488 | 0.737 | 0.989                 | 0.643     | 0.105 | 0.857 | 0.883                  | 0.901 | 0.898 | 0.880 | 0.907                 | 0.900 | 0.894 | 0.901     |       |
|            | RT Depth 1               | 0.968                   | 0.676     | 0.244 | 0.824 | 0.932                 | 0.659     | 0.215 | 0.661 | 0.899                  | 0.837 | 0.816 | 0.885 | 0.805                 | 0.928 | 0.935 | 0.821     |       |
|            | RT Depth 5               | 0.907                   | 0.777     | 0.576 | 0.792 | 0.825                 | 0.702     | 0.430 | 0.602 | 0.965                  | 0.919 | 0.910 | 0.961 | 0.747                 | 0.938 | 0.953 | 0.798     |       |
|            | RT Depth 10              | 0.854                   | 0.807     | 0.669 | 0.737 | 0.775                 | 0.666     | 0.366 | 0.500 | 0.961                  | 0.918 | 0.910 | 0.957 | 0.930                 | 0.845 | 0.820 | 0.918     |       |
|            | RT Depth 15              | 0.882                   | 0.802     | 0.645 | 0.771 | 0.775                 | 0.666     | 0.366 | 0.500 | 0.953                  | 0.928 | 0.922 | 0.950 | 0.883                 | 0.876 | 0.869 | 0.877     |       |
| RT         | RT Depth 20              | 0.882                   | 0.802     | 0.645 | 0.771 | 0.775                 | 0.666     | 0.366 | 0.500 | 0.957                  | 0.921 | 0.914 | 0.953 | 0.805                 | 0.845 | 0.845 | 0.805     |       |
|            | SVM linear_C2            | 0.800                   | 0.842     | 0.756 | 0.699 | 0.907                 | 0.683     | 0.314 | 0.675 | 0.160                  | 0.182 | 0.249 | 0.220 | 0.949                 | 0.884 | 0.869 | 0.942     |       |
|            | SVM linear_C4            | 0.446                   | 0.553     | 0.413 | 0.314 | 0.889                 | 0.677     | 0.308 | 0.631 | 0.195                  | 0.195 | 0.159 | 0.159 | 0.949                 | 0.884 | 0.869 | 0.942     |       |
|            | SVM linear_C6            | 0.461                   | 0.542     | 0.366 | 0.294 | 0.843                 | 0.740     | 0.517 | 0.669 | 0.253                  | 0.228 | 0.102 | 0.115 | 0.914                 | 0.864 | 0.849 | 0.904     |       |
|            | SVM linear_C8            | 0.507                   | 0.947     | 0.953 | 0.543 | 0.554                 | 0.610     | 0.424 | 0.369 | 0.249                  | 0.225 | 0.098 | 0.111 | 0.949                 | 0.884 | 0.869 | 0.942     |       |
| SVM        | SVM linear_C10           | 0.846                   | 0.829     | 0.715 | 0.741 | 0.593                 | 0.634     | 0.442 | 0.400 | 0.965                  | 0.770 | 0.698 | 0.950 | 0.949                 | 0.884 | 0.869 | 0.942     |       |
|            | SVM rbf_g0.0001_C1       | 0.996                   | 0.640     | 0.087 | 0.938 | 0.000                 | undefined | 1.000 | 0.619 | 0.930                  | 0.930 | 0.927 | 0.927 | 0.887                 | 0.934 | 0.935 | 0.888     |       |
|            | SVM rbf_g0.0001_C1000    | 0.496                   | 0.709     | 0.669 | 0.449 | 0.975                 | 0.664     | 0.198 | 0.829 | 0.949                  | 0.921 | 0.914 | 0.945 | 0.957                 | 0.914 | 0.906 | 0.953     |       |
|            | SVM rbf_g0.0001_C1000000 | 0.496                   | 0.709     | 0.669 | 0.449 | 0.539                 | 0.568     | 0.331 | 0.306 | 0.965                  | 0.667 | 0.494 | 0.931 | 0.957                 | 0.914 | 0.906 | 0.953     |       |
|            | SVM rbf_g1_C1            | 1.000                   | 0.626     | 0.029 | 1.000 | 0.993                 | 0.621     | 0.012 | 0.500 | 0.911                  | 0.720 | 0.629 | 0.870 | 0.996                 | 0.545 | 0.127 | 0.969     |       |
|            | SVM rbf_g1_C1000         | 0.961                   | 0.695     | 0.314 | 0.831 | 0.839                 | 0.642     | 0.238 | 0.477 | 0.911                  | 0.720 | 0.629 | 0.870 | 0.996                 | 0.545 | 0.127 | 0.969     |       |
|            | SVM rbf_g1_C1000000      | 0.961                   | 0.695     | 0.314 | 0.831 | 0.839                 | 0.642     | 0.238 | 0.477 | 0.911                  | 0.720 | 0.629 | 0.870 | 0.996                 | 0.545 | 0.127 | 0.969     |       |
|            | SVM rbf_g1000_C1         | 0.000                   | undefined | 1.000 | 0.619 | 0.000                 | undefined | 1.000 | 0.619 | 1.000                  | 0.513 | 0.004 | 1.000 | 1.000                 | 0.512 | 0.000 | undefined | 0.969 |
|            | SVM rbf_g1000_C1000      | 1.000                   | 0.629     | 0.041 | 1.000 | 0.006                 | 1.000     | 1.000 | 0.621 | 1.000                  | 0.513 | 0.004 | 1.000 | 1.000                 | 0.512 | 0.000 | undefined | 0.969 |
|            | SVM rbf_g1_C1000000      | 1.000                   | 0.629     | 0.041 | 1.000 | 1.000                 | 0.621     | 0.006 | 1.000 | 1.000                  | 0.513 | 0.004 | 1.000 | 0.996                 | 0.545 | 0.127 | 0.969     | 0.969 |

# Receiver operator characteristic (ROC) curves

## Scenario S1

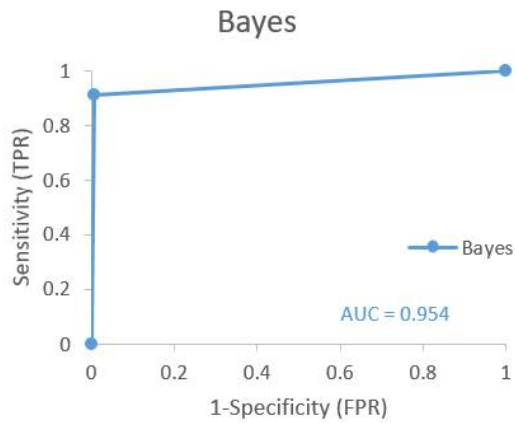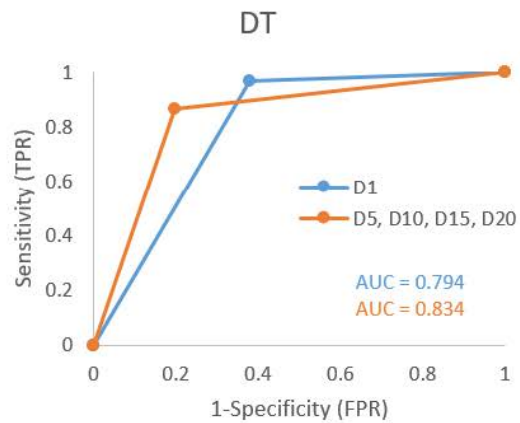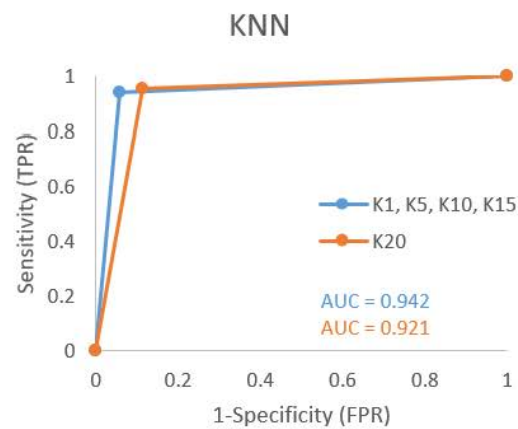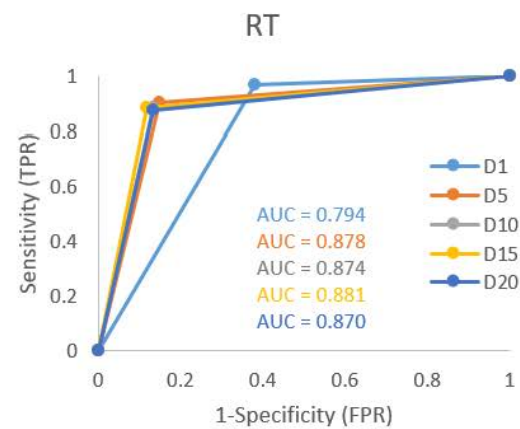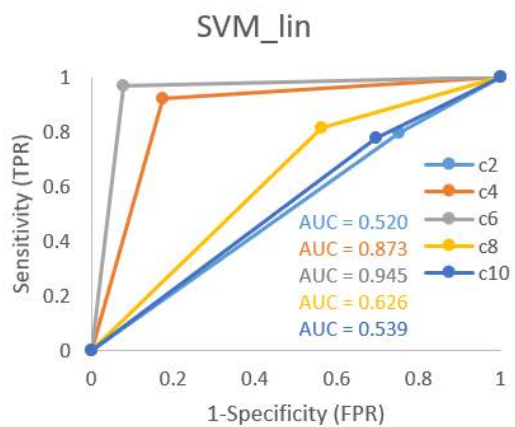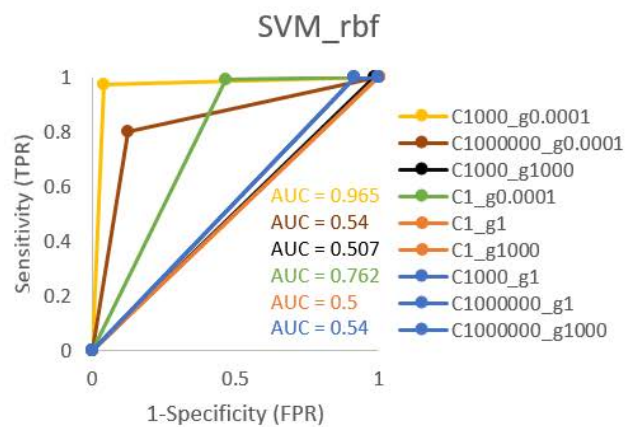

# Scenario S2

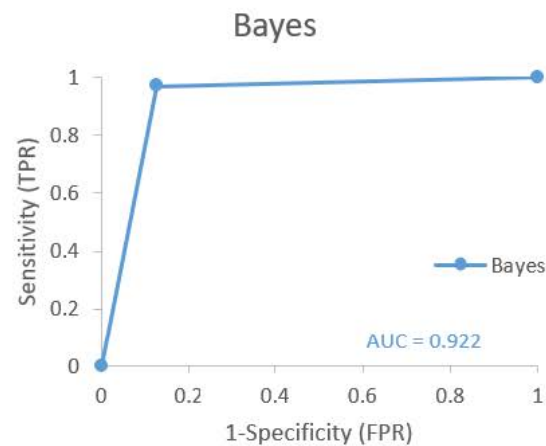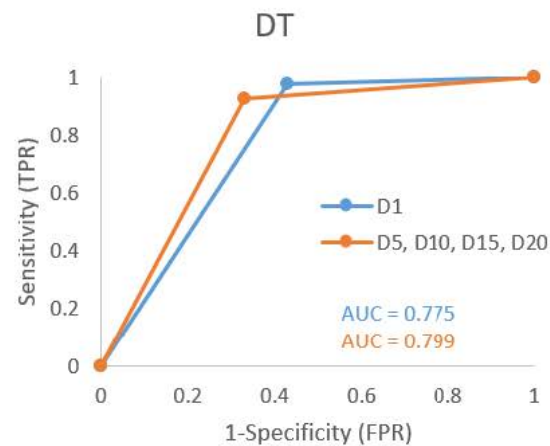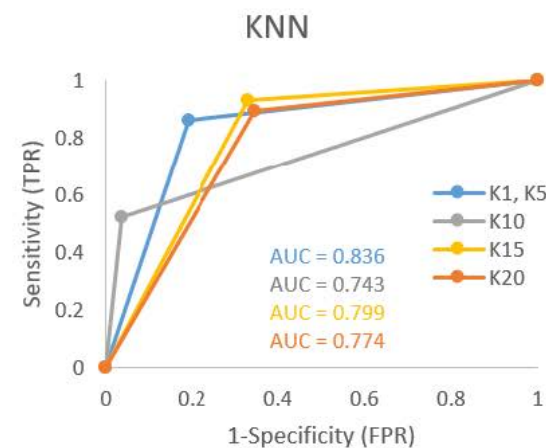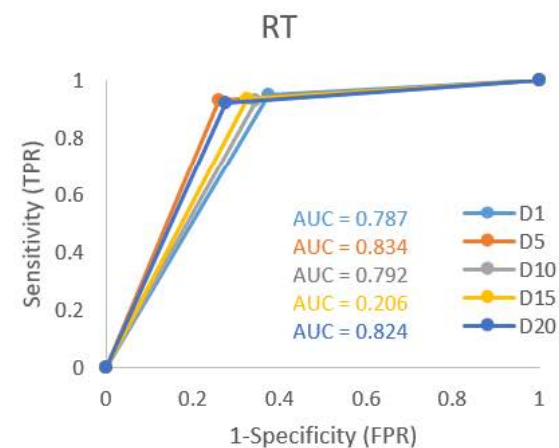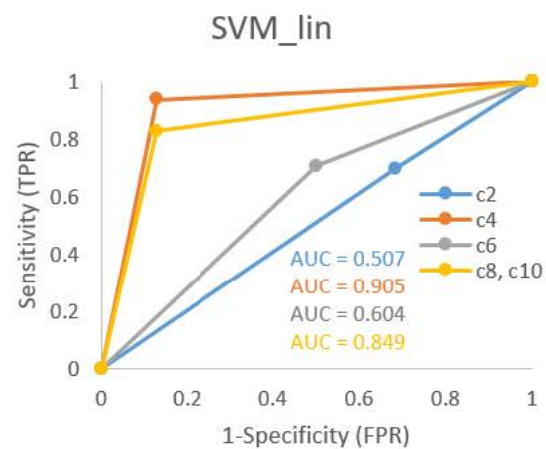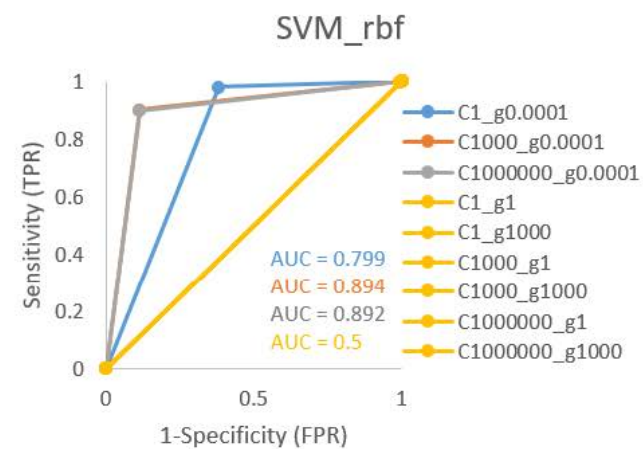

## Scenario S3

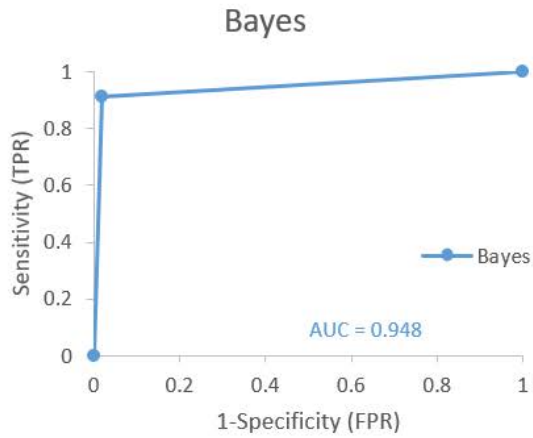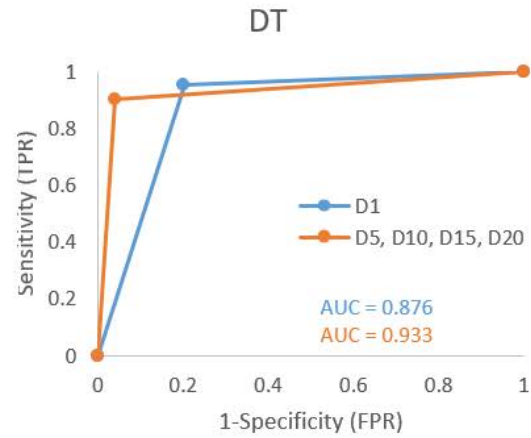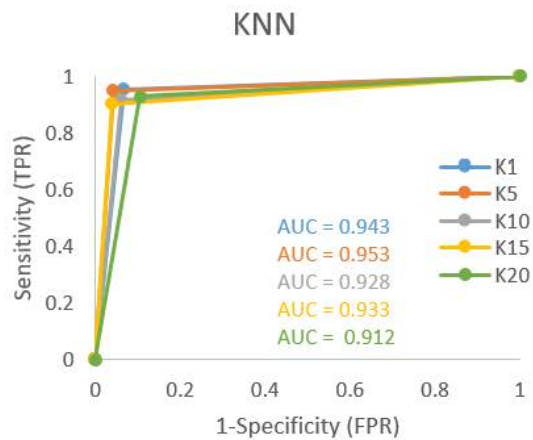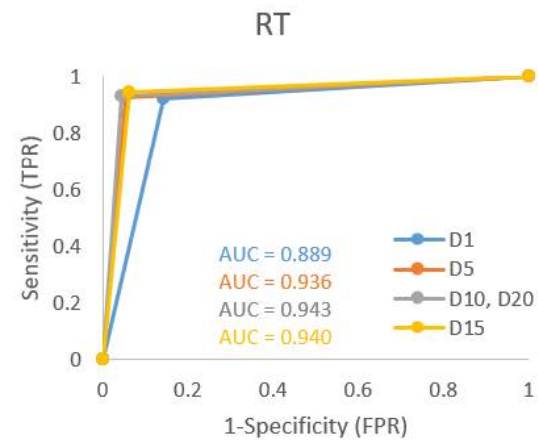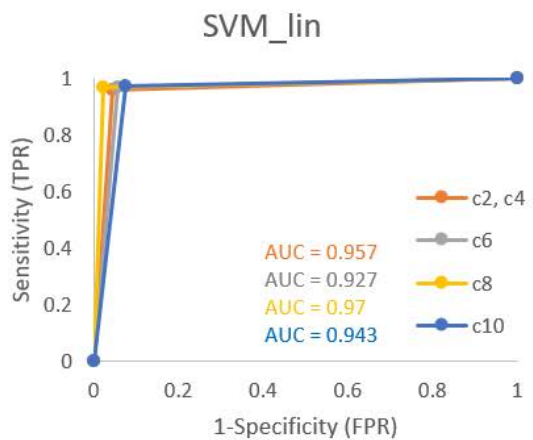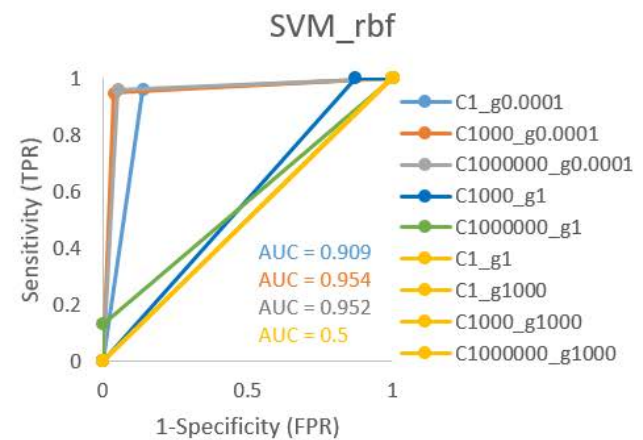

Scenario S4

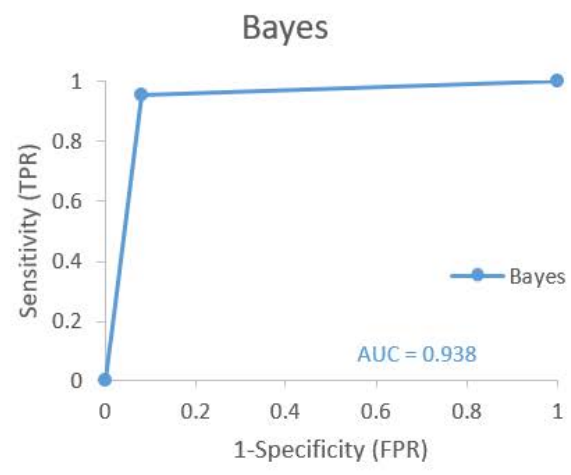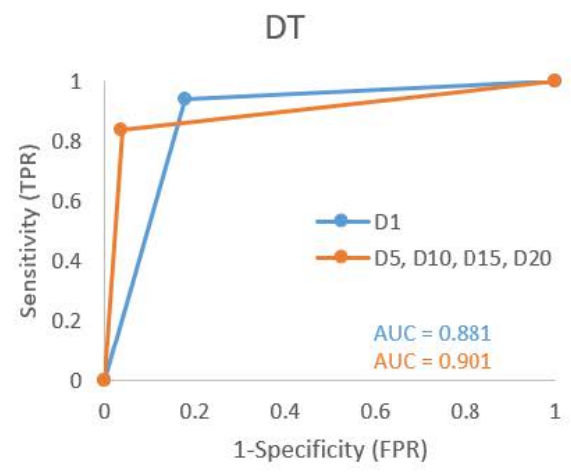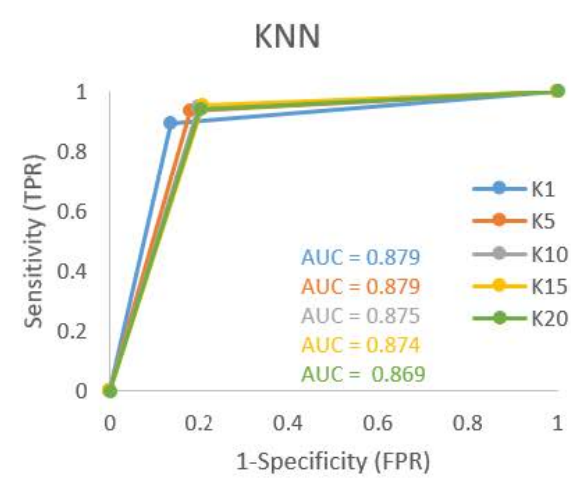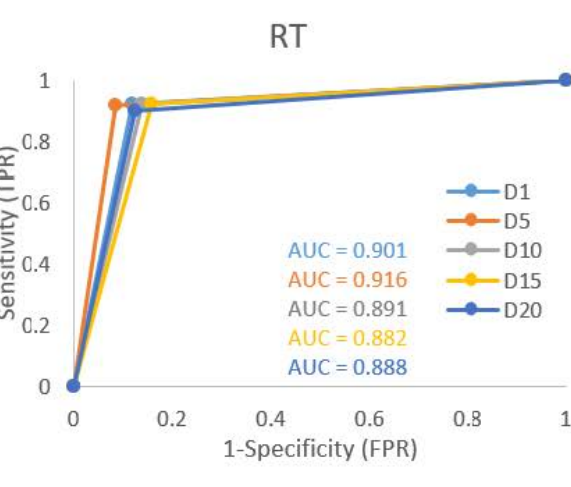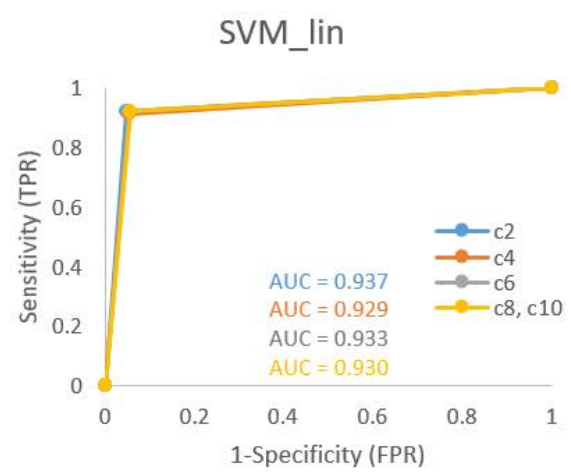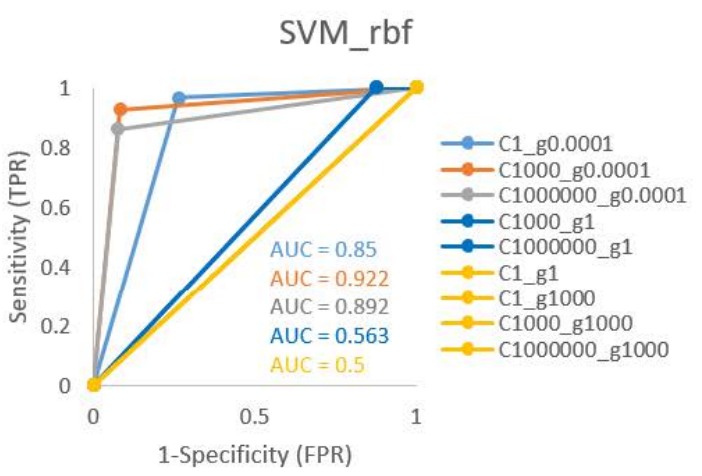



## Scenario S5

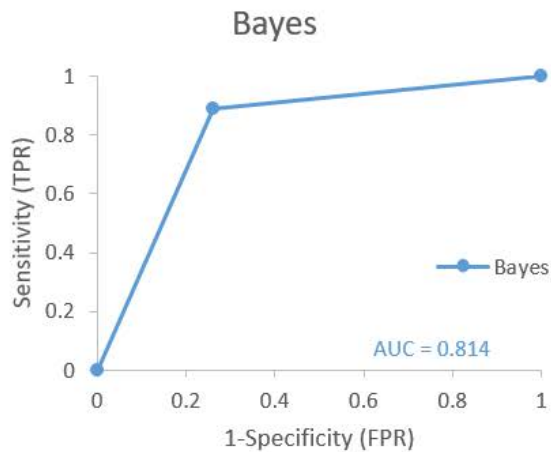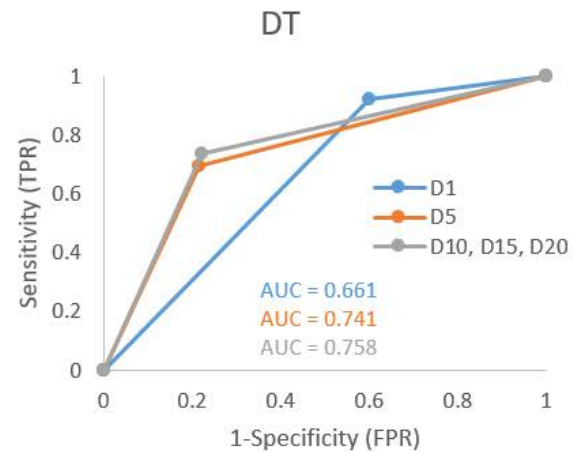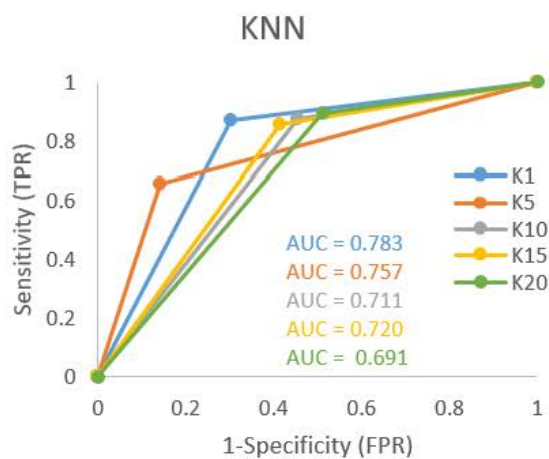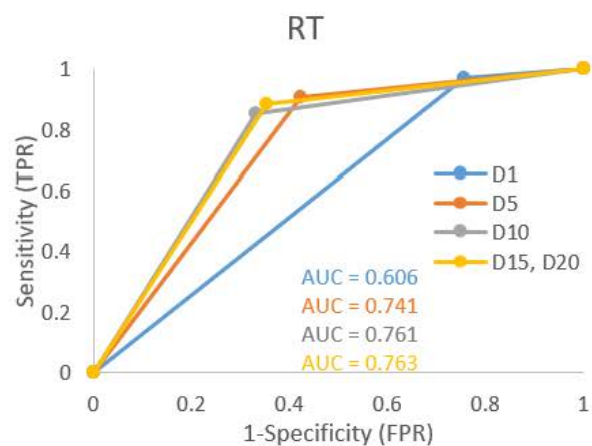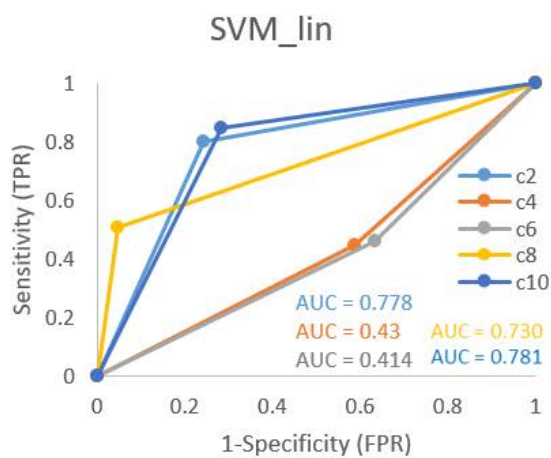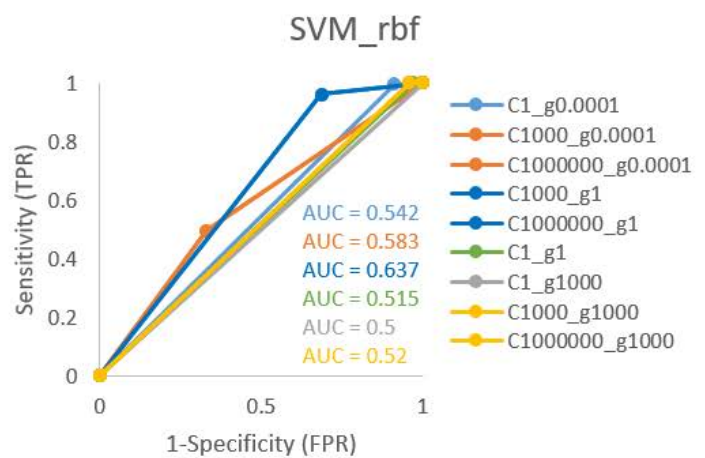

# Scenario S6

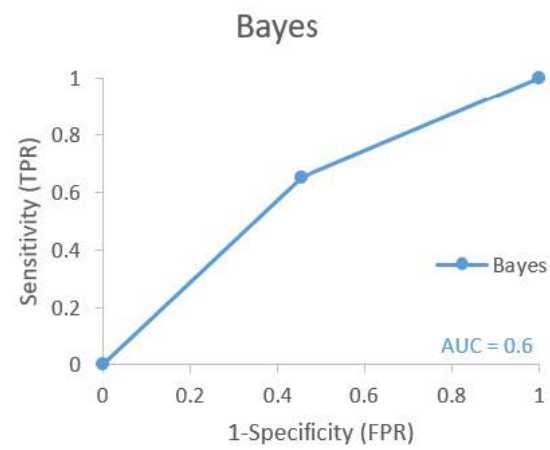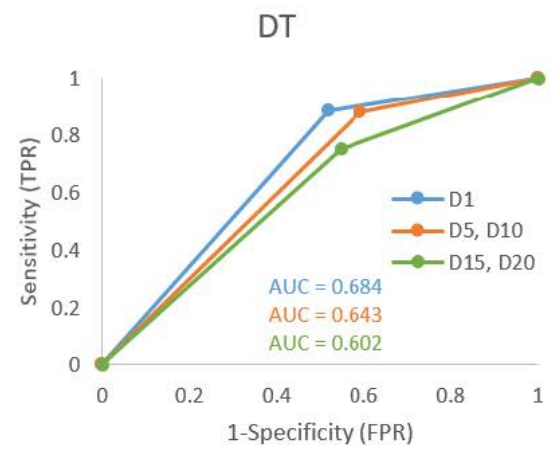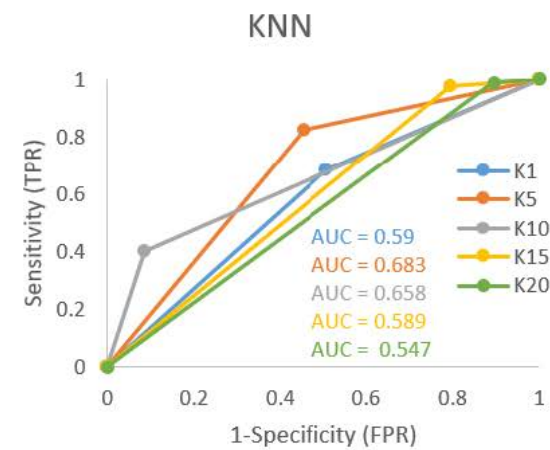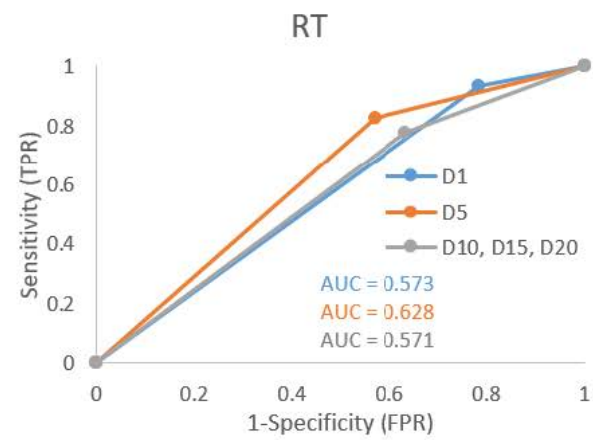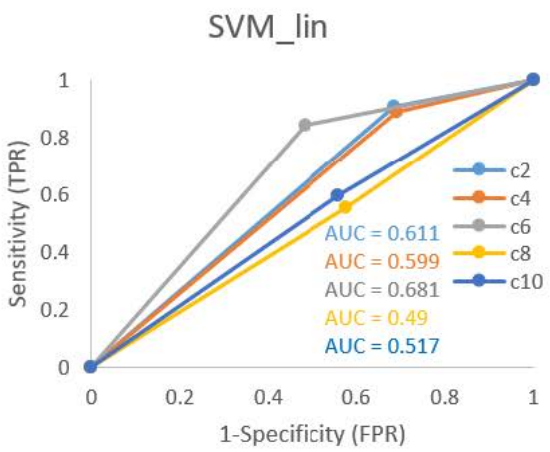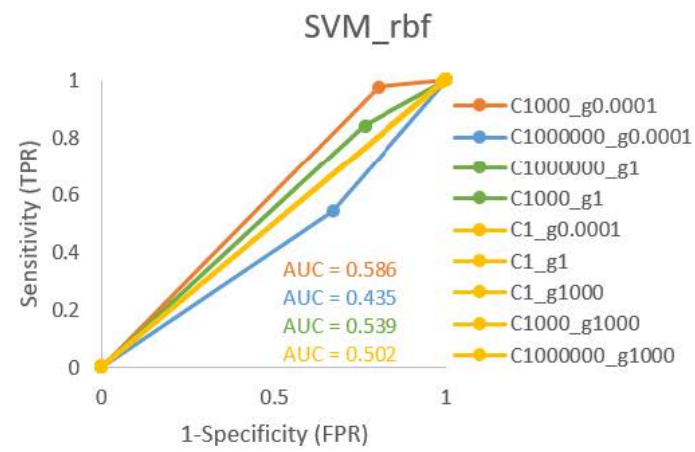

Scenario S7

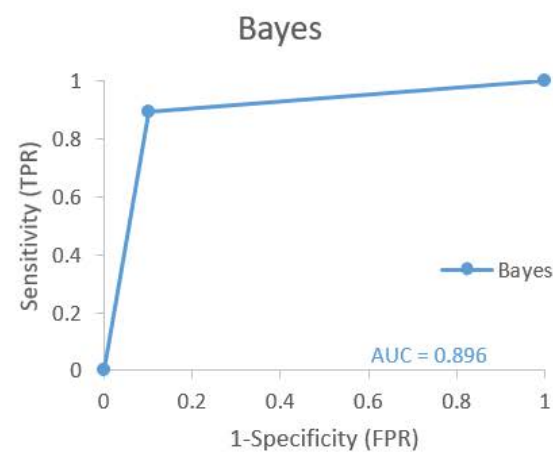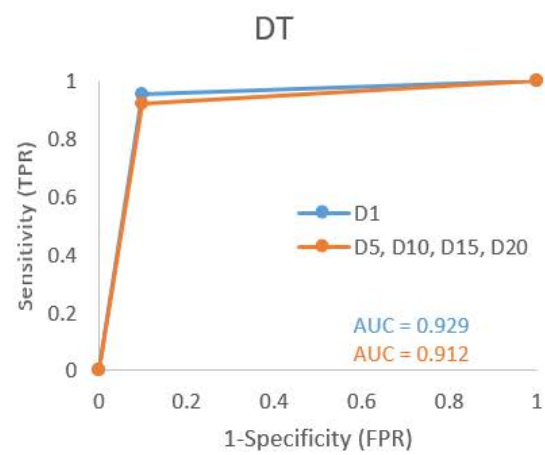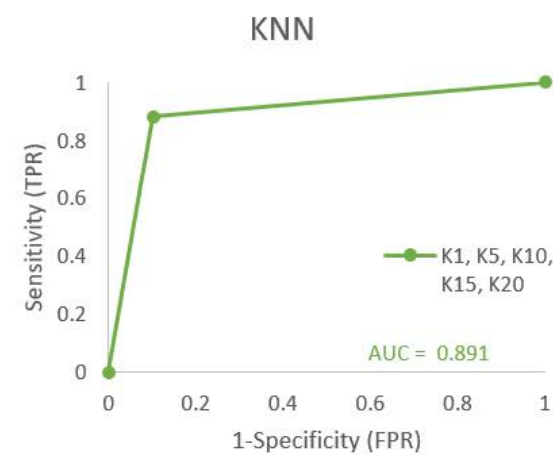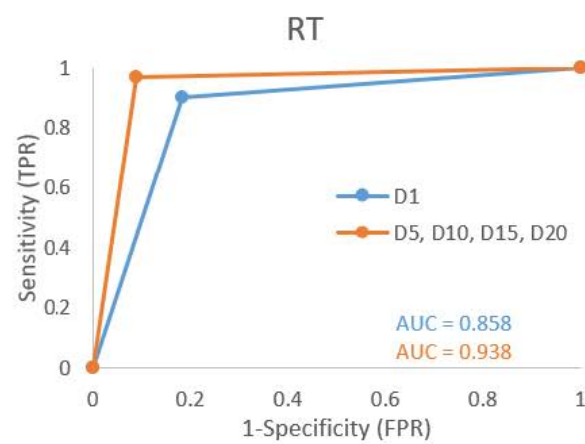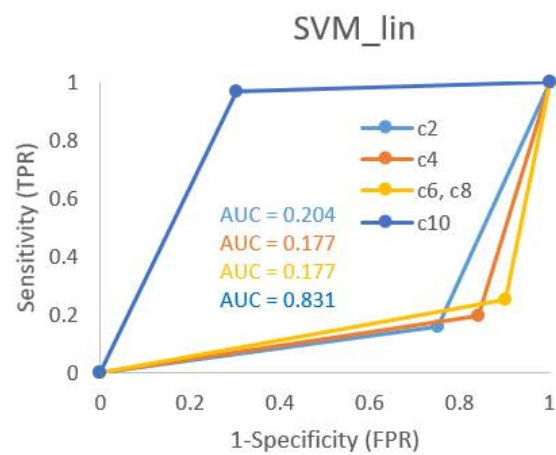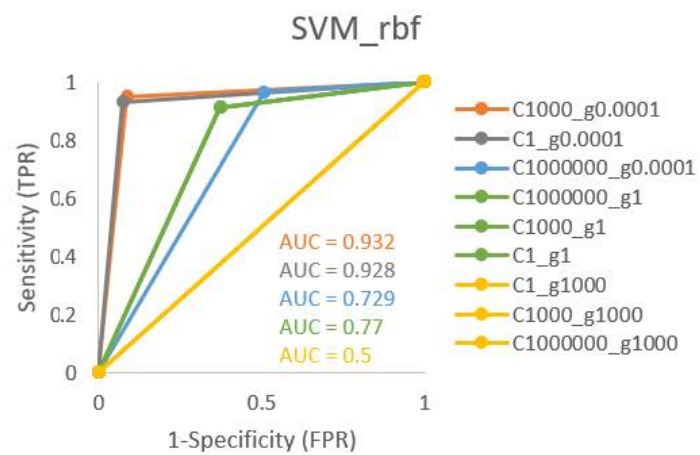



# Scenario S8

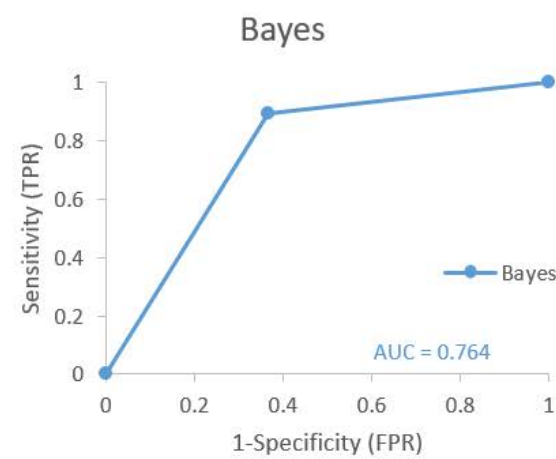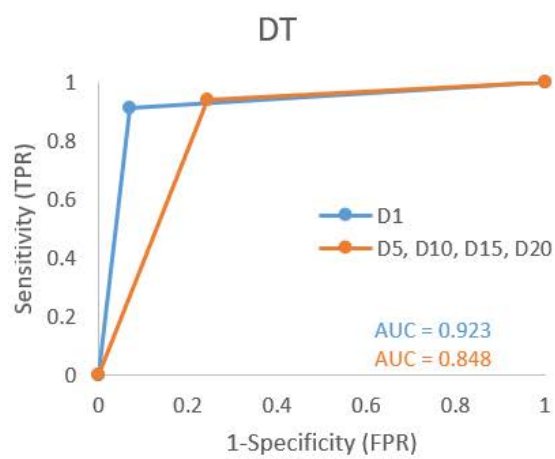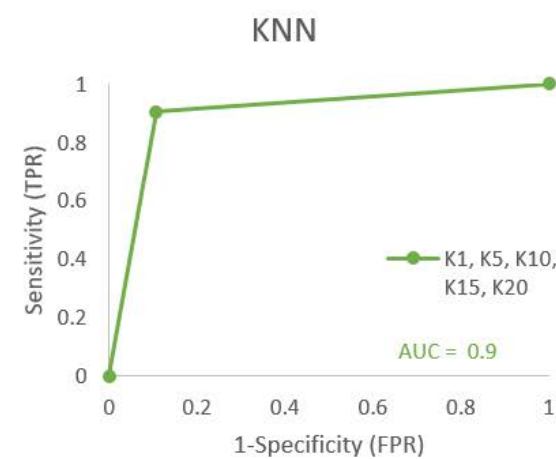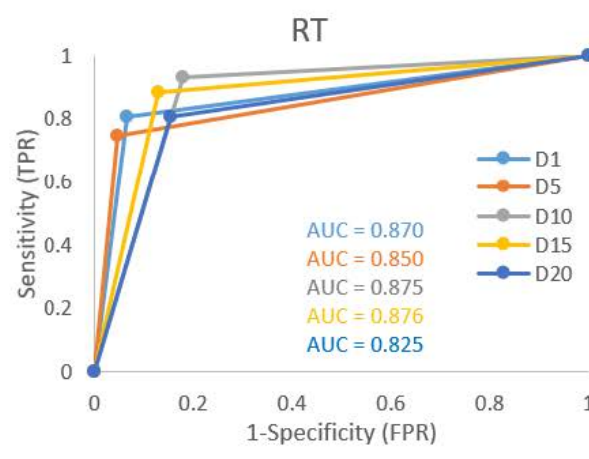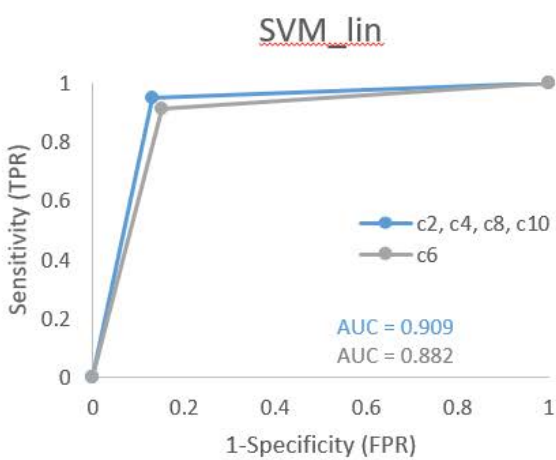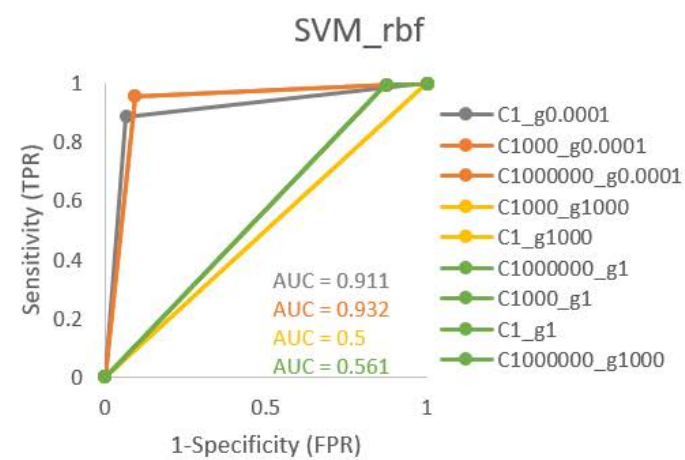

Supplement: s1 [file s1]
